# Supplementary material for: Cognitive and Physical Intervention in Metals’ Dysfunction and Neurodegeneration
Source: MDPI journal article supplement (doi:10.3390/brainsci12030345), 2022-03-03
Supplement: s1 [file s1]

**Tabel S1.** Examples of exercises in neurodegenerative diseases.

| Disease              | Examples of exercises                                                                                                                                                                                                                                                                            |                                                                                                                                                                    |
|----------------------|--------------------------------------------------------------------------------------------------------------------------------------------------------------------------------------------------------------------------------------------------------------------------------------------------|--------------------------------------------------------------------------------------------------------------------------------------------------------------------|
|                      | Physical                                                                                                                                                                                                                                                                                         | Neuropsychological                                                                                                                                                 |
| ALZHEIMER'S DISEASE  | there are no clear health instructions about physical activity                                                                                                                                                                                                                                   | reminiscence therapy, special cognitive rehabilitation program and cognitive training                                                                              |
| PARKINSON DISEASE    | aerobic exercise training (AET), treadmill training, body weight–supported treadmill training (BWSTT), robot training - robot-assisted gait therapy (RAGT), virtual reality (VR), balance training, progressive resistance training (PRT), complementary exercise (tango, qigong, tai chi, yoga) | cognitive training, dual-task training (cognitive and physical, combining executive at the same time) and CBT for comorbidities such as mood and anxiety disorders |
| ALS                  | regular, moderate, daily stretching and resistance exercises                                                                                                                                                                                                                                     | CBT and MBTs                                                                                                                                                       |
| HUNTINGTON'S DISEASE | aerobic and resistive training exercises                                                                                                                                                                                                                                                         | behavioral therapy, CBT                                                                                                                                            |
| WILSON DISEASE       | exercises aimed at improving static and dynamic balance                                                                                                                                                                                                                                          | there are no clear health instructions about neuropsychological therapy                                                                                            |
